1                   **Global profiling of the crotonylome in Small Cell Lung Cancer**

2  
3   Zongpei Guo<sup>2</sup>, Meng Gu<sup>1</sup>, Jiaqiang Huang<sup>1</sup>, Ping-kun Zhou<sup>2,3\*</sup>, Teng Ma<sup>1,2\*</sup>

4  
5   1, Department of Cellular and Molecular Biology, Beijing Chest Hospital, Capital  
6   Medical University/Beijing Tuberculosis and Thoracic Tumor Research Institute,  
7   Beijing, 101149, China.

8   2, Department of Radiation Toxicology and Oncology, Beijing Key Laboratory for  
9   Radiobiology, Beijing Institute of Radiation Medicine, Beijing 100850, P. R. China;

10   3, Institute for Environmental Medicine and Radiation Hygiene, School of Public  
11   Health, University of South China, Hengyang, Hunan Province 421001, P. R. China;

12  
13   \*Correspondences: [mateng82913@163.com](mailto:mateng82913@163.com), [zhoupk@bmi.ac.cn](mailto:zhoupk@bmi.ac.cn).

14  
15  
16  
17  
18  
19  
20  
21  
22  
23  
24  
25  
26  
27  
28  
29  
30  
31  
32  
33  
34  
35  
36  
37  
38  
39  
40

41 **Abstract**

42 Small cell lung cancer is a deadly neuroendocrine lung cancer subtype, which harbors  
43 the driver mutations of *RBI* and *TP53* as well as *EP300/CREBBP*. Since  
44 CREBBP/p300 are two prominent crotonyl-CoA transferases responsible for the  
45 global crotonylation in cells, here we investigated the crotonylome in SCLC tissues  
46 compared with normal lung tissues through TMT labeling coupled with LC-MS/MS  
47 and found unique patterns of protein crotonylation in SCLC related pathways.

48

49

50

51

52

53

54

55

56

57

58

59

60

61

62

63

64

65

66

67

68

69

70

71 **Materials and Methods**

72 **Cell culture**

73 H526 cells purchased from ATCC were maintained in ATCC-formulated RPMI-1640

74 Medium supplemented with 10% FBS. Cells were cultured at 37°C with 5% CO<sub>2</sub>.

75

76 **Patient samples**

77 Paired SCLC tumor and normal tissues were purchased from Shanghai SuperChip

78 Biotech Co. Ltd.

79

80 **Antibodies**

81 Commercial antibodies were used as follows: anti-STMN1 (Abcam, ab52630),

82 anti-crotonyllysine antibody (PTM, 501), anti-β-actin (Abcam, ab8227).

83

84 **Protein extraction and trypsin digestion**

85 The tissue samples are taken from -80 °C and ground thoroughly to powder with

86 liquid nitrogen. Then 4X volumes of lysis buffer was added to the tissue powder (8M

87 urea, 1% protease inhibitor, 3μM TSA and 50mM NAM). Samples were sonicated.

88 The remaining debris was removed by centrifuge at 12,000g at 4°C for 10min. The

89 supernatant was collected and the protein concentration was determined with a BCA

90 kit according to the manufacturer's instructions. For trypsin digestion, the protein

91 supernatant was treated with 5mM dithiothreitol (DTT) for 30min at 56°C and

92 alkylated with 11mM iodoacetamide for 15min at room temperature in darkness. The

93 protein samples were then diluted with 100mM triethylammonium bicarbonate

94 (TEAB) to urea concentration of less than 2M. Finally, trypsin was added at 1:50

95 mass ration of trypsin/protein and proteins were digested overnight. A second 4h

96 digestion was performed with trypsin/protein at 1:100 mass ration.

97

98 **TMT labeling**

99 After trypsin digestion, peptide was desalted by Strata X C18 SPE column

100 (Phenomenex) and vacuum-dried. Peptide was reconstituted in 0.5 M TEAB and  
101 processed according to the manufacturer's protocol for TMT kit. Briefly, one unit of  
102 TMT reagent were thawed and reconstituted in acetonitrile. The peptide mixtures  
103 were then incubated for 2 h at room temperature and pooled, desalted and dried by  
104 vacuum centrifugation.

105

#### 106 **Crotonylation modified peptide enrichment**

107 To enrich modified peptides, tryptic peptides dissolved in NETN buffer (100 mM  
108 NaCl, 1 mM EDTA, 50 mM Tris-HCl, 0.5% NP-40, pH 8.0) were incubated with  
109 pre-washed antibody beads (Lot number 001, PTM Bio) at 4°C overnight with gentle  
110 shaking. Then the beads were washed four times with NETN buffer and twice with  
111 H<sub>2</sub>O. The bound peptides were eluted from the beads with 0.1% trifluoroacetic acid.  
112 Finally, the eluted fractions were combined and vacuum-dried. For LC-MS/MS  
113 analysis, the resulting peptides were desalted with C18 ZipTips (Millipore) according  
114 to the manufacturer's instructions.

115

#### 116 **LC-MS/MS analysis**

117 The tryptic peptides were dissolved in 0.1% formic acid (solvent A), directly loaded  
118 onto a home-made reversed-phase analytical column (15-cm length, 75 µm i.d.). The  
119 gradient was comprised of an increase from 6% to 23% solvent B (0.1% formic acid  
120 in 98% acetonitrile) over 26 min, 23% to 35% in 8 min and climbing to 80% in 3 min  
121 then holding at 80% for the last 3 min, all at a constant flow rate of 400 nL/min on an  
122 EASY-nLC 1000 UPLC system.

123 The peptides were subjected to NSI source followed by tandem mass spectrometry  
124 (MS/MS) in Q Exactive<sup>TM</sup> Plus (Thermo) coupled online to the UPLC. The  
125 electrospray voltage applied was 2.0 kV. The m/z scan range was 350 to 1800 for full  
126 scan, and intact peptides were detected in the Orbitrap at a resolution of 70,000.  
127 Peptides were then selected for MS/MS using NCE setting as 28 and the fragments  
128 were detected in the Orbitrap at a resolution of 17,500. A data-dependent procedure  
129 that alternated between one MS scan followed by 20 MS/MS scans with 15.0s

130 dynamic exclusion. Automatic gain control (AGC) was set at 5E4. Fixed first mass  
131 was set as 100 m/z.

132

### 133 **Database search**

134 The resulting MS/MS data were processed using Maxquant search engine (v.1.5.2.8).  
135 Tandem mass spectra were searched against human uniprot database concatenated  
136 with reverse decoy database. Trypsin/P was specified as cleavage enzyme allowing up  
137 to 4 missing cleavages. The mass tolerance for precursor ions was set as 20 ppm in  
138 First search and 5 ppm in Main search, and the mass tolerance for fragment ions was  
139 set as 0.02 Da. Carbamidomethyl on Cys was specified as fixed modification and  
140 Acetylation modification and oxidation on Met were specified as variable  
141 modifications. FDR was adjusted to < 1% and minimum score for modified peptides  
142 was set > 40.

143

### 144 **Bioinformatics analysis**

145 Gene Ontology (GO) annotation proteome was derived from the UniProt-GOA  
146 database (<http://www.ebi.ac.uk/GOA/>). Identified proteins domain functional  
147 description were annotated by InterProScan (a sequence analysis application) based  
148 on protein sequence alignment method, and the InterPro  
149 (<http://www.ebi.ac.uk/interpro/>) domain database was used. Kyoto Encyclopedia of  
150 Genes and Genomes (KEGG) database was used to annotate protein pathway. We  
151 used wolfpsort, a subcellular localization predication soft to predict subcellular  
152 localization. Soft MoMo (motif-x algorithm) was used to analysis the model of  
153 sequences constituted with amino acids in specific positions of modify-21-mers (10  
154 amino acids upstream and downstream of the site). Enrichment of GO or KEGG  
155 analysis was done by a two-tailed Fisher's exact test to test the enrichment of the  
156 differentially modified proteins. STRING database version 10.1 was used for  
157 protein-protein interactions and Cytoscape software was used for visualization.

158

### 159 **Immunoprecipitation and western blotting**

160 For immunoprecipitation, cells were lysed with NETN-300 buffer (20mM Tris-HCl  
161 Ph8.0, 300mM NaCl, 1mM EDTA, 0.5% Nonidet P-40) containing protease inhibitor  
162 cocktail (Roche), 3 $\mu$ M TSA and 50mM NAM on ice for 10min, then supplemented  
163 double volume of NETN-100 buffer (20mM Tris-HCl pH8.0, 100mM NaCl, 1mM  
164 EDTA, 0.5% Nonidet P-40). The lysates were centrifuged at 12000g for 10min at 4°C.  
165 The supernatants were collected and incubated with 1.5 $\mu$ g anti-STMN1 antibody  
166 overnight at 4°C, then protein A/G agarose (Santa Cruz) was added and incubated for  
167 3h at 4°C. Then the agarose was collected by centrifuging at 1000g for 3min and  
168 washed 3 times by NETN-100 buffer, and the immunoprecipitated proteins detected  
169 by western blot.

170

#### 171 **Main text**

172 Small Cell Lung Cancer accounts for ~15% of lung cancer incidence with highest  
173 mortality. Concurrent driver mutations of *RBI* and *TP53* have been clearly  
174 demonstrated<sup>1,2</sup>. Mutual exclusive mutations of *CREBBP/EP300* have also been found.  
175 The CREBBP and p300 proteins as well as PCAF and MOF catalyze the crotonylation  
176 on histones and non-histone proteins<sup>3</sup>. Crotonylation has been demonstrated to be  
177 involved transcription and DNA repair<sup>3,4</sup>. Though several proteomic studies have been  
178 focused on the regulation of crotonylation in cells<sup>4-6</sup>, the relationship between protein  
179 crotonylation and cancer is unknown. Here we collected resected small cell lung  
180 cancer tissues from 3 different patients along with the paired normal lung tissue as  
181 control. The TMT labeling and LC-MS/MS analysis was shown in flowchart (Figure  
182 1A). We finally identified 1712 sites of 662 proteins containing quantitative  
183 information. The data was normalized with a protein quantification proteomic to  
184 exclude the effect of protein expression on the modification signal.

185

186 The differentially modified sites between SCLC tissue and normal control were  
187 screened following the criteria: 2 times as the change threshold and t-test *p*-value <  
188 0.05. The Number of modification sites per protein and peptides length are shown in

189 Figure S1A and S1B. The distribution of mass errors was near zero indicating  
190 accuracy of the MS data (Figure S1C). Based on the above data and criteria, we found  
191 368 upregulated modified sites of 145 proteins in the SCLC tissues compared with  
192 Normal control, and 14 downregulated sites of 13 proteins. (Figure 1B and Figure  
193 S1D). As shown in volcano plot of Figure 1B, several important regulators of tumor  
194 metastasis or tumor microenvironment such as PECAM1 (Platelet and Endothelial  
195 Cell Adhesion Molecule 1; CD31)<sup>7</sup>, CAV1 (caveolin-1)<sup>8-10</sup>, Complement C3<sup>11,12</sup> and  
196 STMN1<sup>13</sup> are modified with crotonylation in SCLC tissues. The protein subcellular  
197 analysis showed that 65 proteins were in cytoplasm, 33 proteins in extracellular and  
198 27 proteins in nucleus (Figure 1C), suggesting a broad spectrum of functions of  
199 crotonylation modified proteins in SCLC.

200

201 Next, Gene Ontology classification and enrichment analysis showed that  
202 crotonylation modified proteins in SCLC are involved processes of wound healing  
203 which is the hallmark of cancer (Figure S2)<sup>14,15</sup>. To gain an insight of crotonylome  
204 function in SCLC, we divided the differentially modified sites into 4 categories based  
205 on the change ratio of SCLC/Normal, namely Q1 (<0.05), Q2 (0.500-0.667), Q3  
206 (1.5~2) and Q4 (>2). Then each category was clustered according to KEGG analysis  
207 as it showed in Figure 1D. In Q4, tight junction<sup>16</sup>, complement and coagulation and  
208 Platelet activation<sup>17</sup> were most related pathways to SCLC or cancer. In Q3 cluster,  
209 both SCLC signature and Lysine degradation pathway which produces crotonyl-CoA  
210 were found. Immune regulation pathways and cancer related pathways such as  
211 PI3K-Akt were also found (Figure 1D). Protein domain enrichment analysis indicated  
212 that the EF-hand domains are closely related with SCLC and inflammation (Figure  
213 S3)<sup>18</sup>. The PPI network indicated the SCLC crotonylome falls into several complexes  
214 (Figure S3).

215

216 To investigate the amino acid frequency of occurrence upstream and downstream  
217 from the crotonylation modification site, the flanking sequences were analyzed. The  
218 results showed that alanine (A) and glutamate (E) residues were overrepresented at

219 the -1 and +1 positions surrounding the crotonylated lysine respectively (Figure 1E).  
220 Further characterization of the motifs surrounding lysine crotonylation sites showed a  
221 series of different patterns of crotonylation motifs and a representative motif logo was  
222 shown (Figure 1E).

223

224 To investigate whether the crotonylation modified proteins overlap with previous cell  
225 line-based proteomics studies, the differentially modified proteins in SCLC vs Normal  
226 from our study were compared with Yu et al. study which is about CDYL regulated  
227 crotonylome, Wu et al. study which is about non-histone crotonylome and Huang et al.  
228 study which is about p300 regulated crotonylome. 57, 67 and 33 proteins were found  
229 to overlap with their findings respectively (Figure 1F). There are some common  
230 targeted proteins such as STMN1 and histones in both p300 regulated crotonylome  
231 and SCLC/normal crotonylome. However, the majority modified proteins are not  
232 over-lapping, highlighting the unique crotonylome in SCLC tissue from previous  
233 cellular proteomics. Furthermore, the pan-crotonylation signal was increased in SCLC  
234 tissue vs normal control (Figure 1G). STMN1 was modified by crotonylation (Figure  
235 S4) and validated in H526 cells (Figure 1H).

236

237 Since CREBBP, p300, PCAF(KAT2B) and MOF(KAT8) are the major crotonyl-CoA  
238 transferases in cells, we investigated their relative expression profiles as well as other  
239 known acetyl-CoA transferases in SCLC tissues. RNA-Seq data of 81 SCLC patients  
240 from George et al. study were extracted and analyzed<sup>2</sup>. *KAT2A (GCN5)*, *KAT8 (MOF)*  
241 and *EP300* showed relative higher expressions in SCLC. Next we checked whether  
242 any of these crotonyl-CoA transferases could associate with patients prognosis. The  
243 results demonstrated that only p300 had the favorable overall survival in the  
244 Kaplan-Meier survival analysis with *P* value =0.0161 while *KAT2A*, *KAT8* and *CDYL*  
245 (the crotonylation hydratase) had no prognostic significance (Figure S5), suggesting  
246 that p300's function as crotonyl-CoA transferase could play tumor suppressor  
247 functions in SCLC which is similar to the reported role of CREBBP in SCLC<sup>16</sup>.

248



249 In summary, our study is the first systematic analysis of crotonylation in SCLC tissues.  
250 Further investigations of the functions of protein crotonylation in diverse pathways  
251 may shed light on the understanding of malignant behaviors of SCLC including  
252 metastasis, immune suppression and chemo/radio-resistance.

253

#### 254 **Acknowledgement**

255 This study was supported by grants from the National Natural Science Foundation of  
256 China (31570853, 81602799, 81530085, 31870847).

257

258

#### 259 **CONFLICTS OF INTEREST**

260 The authors declare no conflicts of interest.

261

#### 262 **References**

- 263 1. Peifer, M. *et al.* Integrative genome analyses identify key somatic driver mutations  
264 of small-cell lung cancer. *Nature genetics* **44**, 1104–1110 (2012).
- 265 2. George, J. *et al.* Comprehensive genomic profiles of small cell lung cancer. *Nature*  
266 **524**, 47–53 (2015).
- 267 3. Wan, J., Liu, H., Chu, J. & Zhang, H. Functions and mechanisms of lysine  
268 crotonylation. *Journal of cellular and molecular medicine* **23**, 7163–7169 (2019).
- 269 4. Yu, H. *et al.* Global crotonylome reveals CDYL-regulated RPA1 crotonylation in  
270 homologous recombination-mediated DNA repair. *Science advances* **6**, eaay4697  
271 (2020).
- 272 5. Xu, W. *et al.* Global profiling of crotonylation on non-histone proteins. *Cell*  
273 *research* **27**, 946–949 (2017).
- 274 6. Huang, H., Wang, D.-L. & Zhao, Y. Quantitative Crotonylome Analysis Expands  
275 the Roles of p300 in the Regulation of Lysine Crotonylation Pathway. *Proteomics*  
276 **18**, e1700230 (2018).
- 277 7. Zhang, Y.-Y. *et al.* CD31 regulates metastasis by inducing epithelial-mesenchymal  
278 transition in hepatocellular carcinoma via the ITGB1-FAK-Akt signaling pathway.  
279 *Cancer letters* **429**, 29–40 (2018).
- 280 8. Lu, Z., Ghosh, S., Wang, Z. & Hunter, T. Downregulation of caveolin-1 function  
281 by EGF leads to the loss of E-cadherin, increased transcriptional activity of  
282 beta-catenin, and enhanced tumor cell invasion. *Cancer cell* **4**, 499–515 (2003).
- 283 9. Goetz, J. G. *et al.* Biomechanical remodeling of the microenvironment by stromal  
284 caveolin-1 favors tumor invasion and metastasis. *Cell* **146**, 148–163 (2011).

- 285 10. Bernatchez, P. Endothelial caveolin and its scaffolding domain in cancer. *Cancer*  
286 *metastasis reviews* (2020).
- 287 11. Wang, Y. *et al.* Autocrine Complement Inhibits IL10-Dependent T-cell-Mediated  
288 Antitumor Immunity to Promote Tumor Progression. *Cancer discovery* **6**, 1022–  
289 1035 (2016).
- 290 12. Markiewski, M. M. *et al.* Modulation of the antitumor immune response by  
291 complement. *Nature immunology* **9**, 1225–1235 (2008).
- 292 13. Baldassarre, G. *et al.* p27(Kip1)-stathmin interaction influences sarcoma cell  
293 migration and invasion. *Cancer cell* **7**, 51–63 (2005).
- 294 14. Ge, Y. & Fuchs, E. Stretching the limits: from homeostasis to stem cell plasticity  
295 in wound healing and cancer. *Nature reviews. Genetics* **19**, 311–325 (2018).
- 296 15. Arwert, E. N., Hoste, E. & Watt, F. M. Epithelial stem cells, wound healing and  
297 cancer. *Nature reviews. Cancer* **12**, 170–180 (2012).
- 298 16. Jia, D. *et al.* Crebbp Loss Drives Small Cell Lung Cancer and Increases  
299 Sensitivity to HDAC Inhibition. *Cancer discovery* **8**, 1422–1437 (2018).
- 300 17. Gay, L. J. & Felding-Habermann, B. Contribution of platelets to tumour metastasis.  
301 *Nature reviews. Cancer* **11**, 123–134 (2011).
- 302 18. Heizmann, C. W. Ca<sup>2+</sup>-Binding Proteins of the EF-Hand Superfamily: Diagnostic  
303 and Prognostic Biomarkers and Novel Therapeutic Targets. *Methods in molecular*  
304 *biology (Clifton, N.J.)* **1929**, 157–186 (2019).

305

306

### 307 **Figure legend**

308

309 **Figure 1. Identification of crotonylome in SCLC.** (A) Flow chart of the proteomics  
310 procedure. (B) The volcano distribution of differentially modified proteins. (C) The  
311 subcellular distribution of differentially modified proteins. (D) The 4 categories  
312 cluster of KEGG pathway analysis of differentially modified proteins. (E) Motif  
313 analysis of all identified crotonylated sites. (F) Venn Diagram of the overlapping  
314 crotonylated proteins between previous studies and this study. (G) Overall  
315 crotonylation detection in SCLC tissue and normal control. (H) Validation of STMN1  
316 as crotonylated protein in H562 cells. (I) Relative expression profile of known  
317 crotonyl-CoA transferases. (J) Kaplan-Meier analysis of survival probability of SCLC  
318 patients with either high or low *EP300* expression.

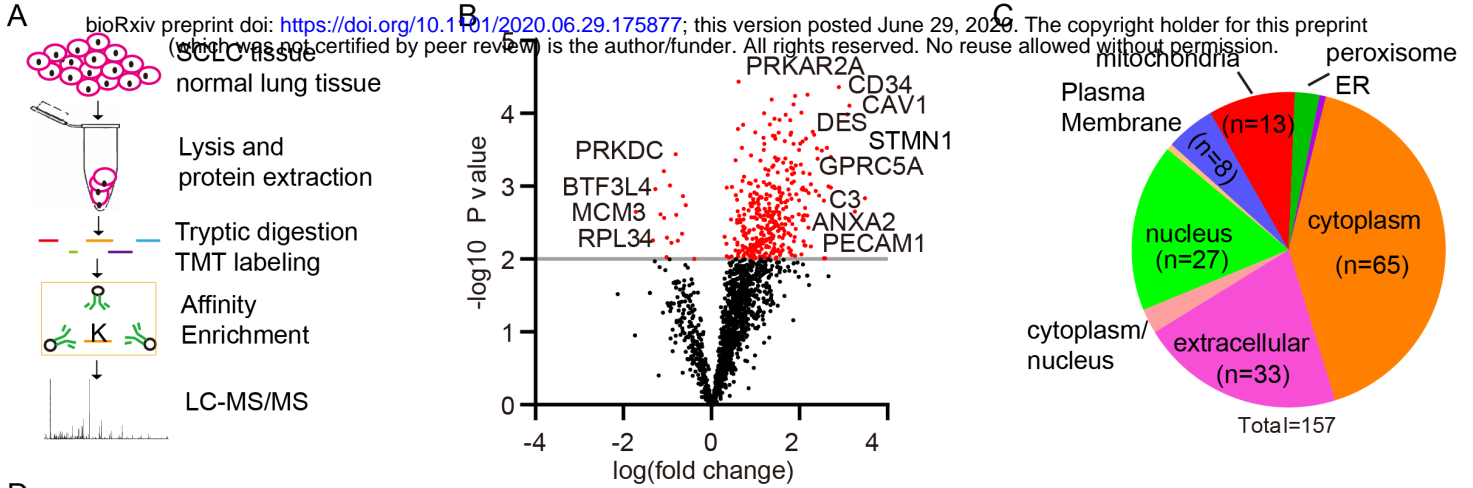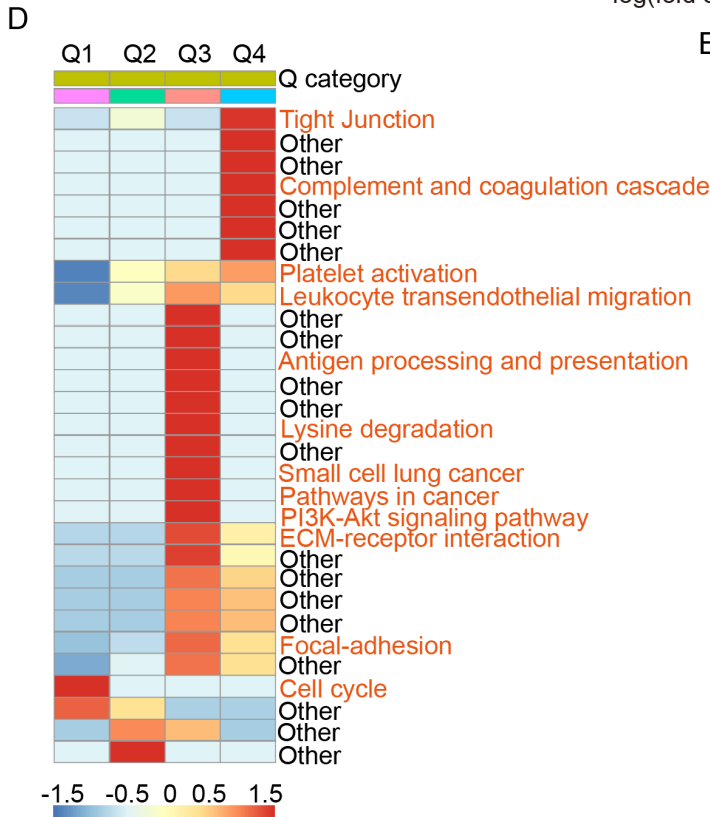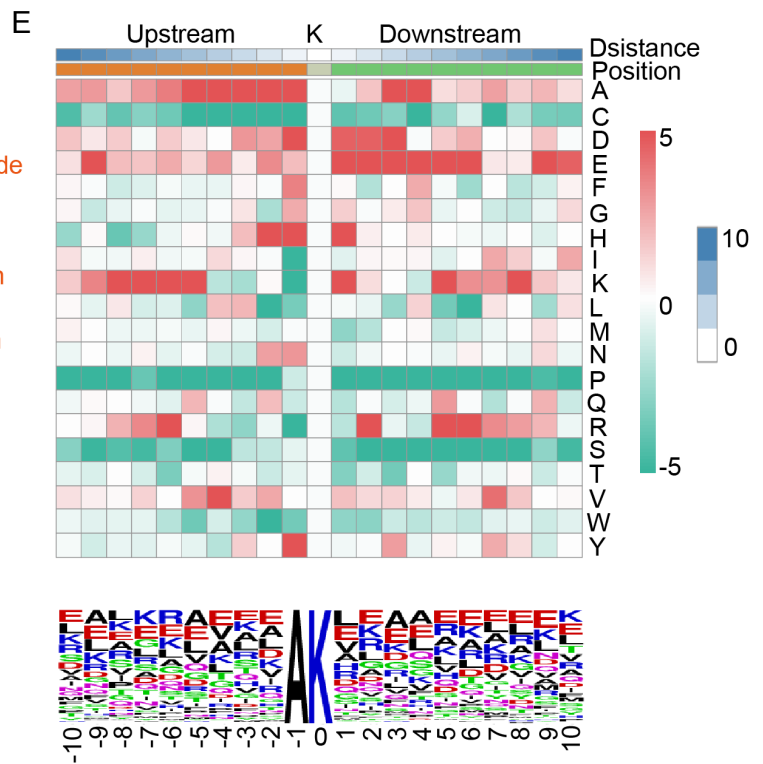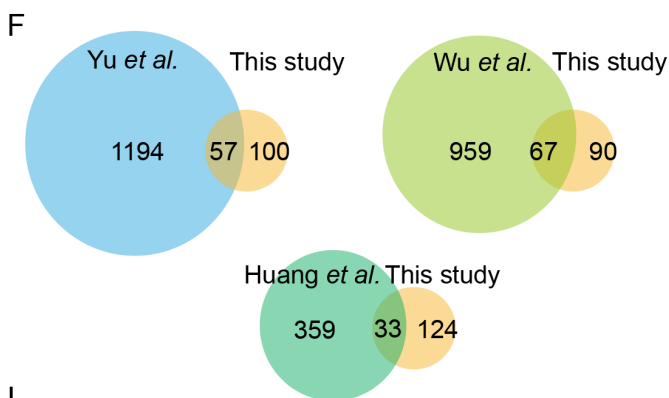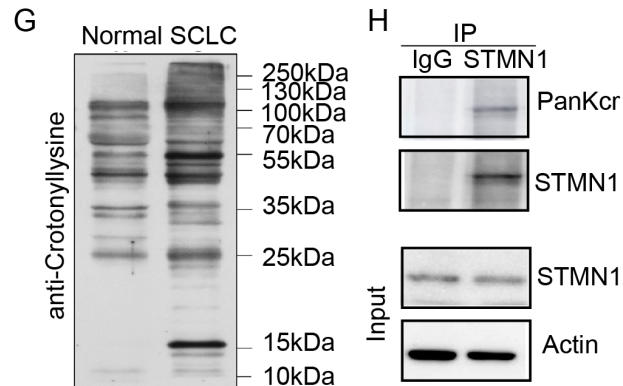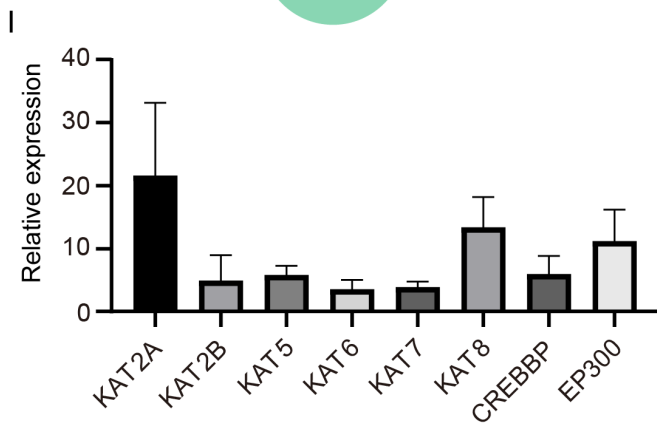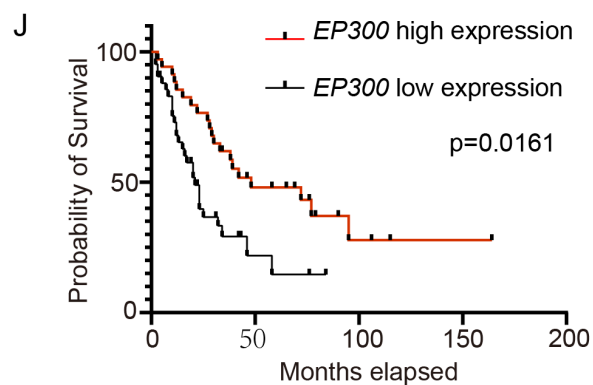

Source: https://www.biorxiv.org/content/10.1101/2020.06.29.175877v1.full.pdf
